# Supplementary material
Source: publisher figshare collection journal article supplement (https://sage.figshare.com/ndownloader/files/20020637)
Supplement: Supplementary file 1 [file 20020637]

Author response v.2

Reviewer #1:

Comment 1: Although the authors have described the figures in the text, a brief description for the mechanisms displayed in Figures 2-7 should be provided separately as Figure legends.

**Response: We thank the reviewer for this valuable suggestion. We have provided brief descriptions as figure legends for the mechanisms displayed in Figures 2-7.**

Comment 2: Please increase the font size of the arrows in Figure 2 like those in subsequent figures.

**Response: We thank the reviewer for this suggestion. We have increased the font size of the arrows in Figure 2.**
